# Supplementary material for: Characterising Complex Enzyme Reaction Data
Source: PubMed Central journal article supplement (PMC4740462; doi:10.1371/journal.pone.0147952), 2016-02-03

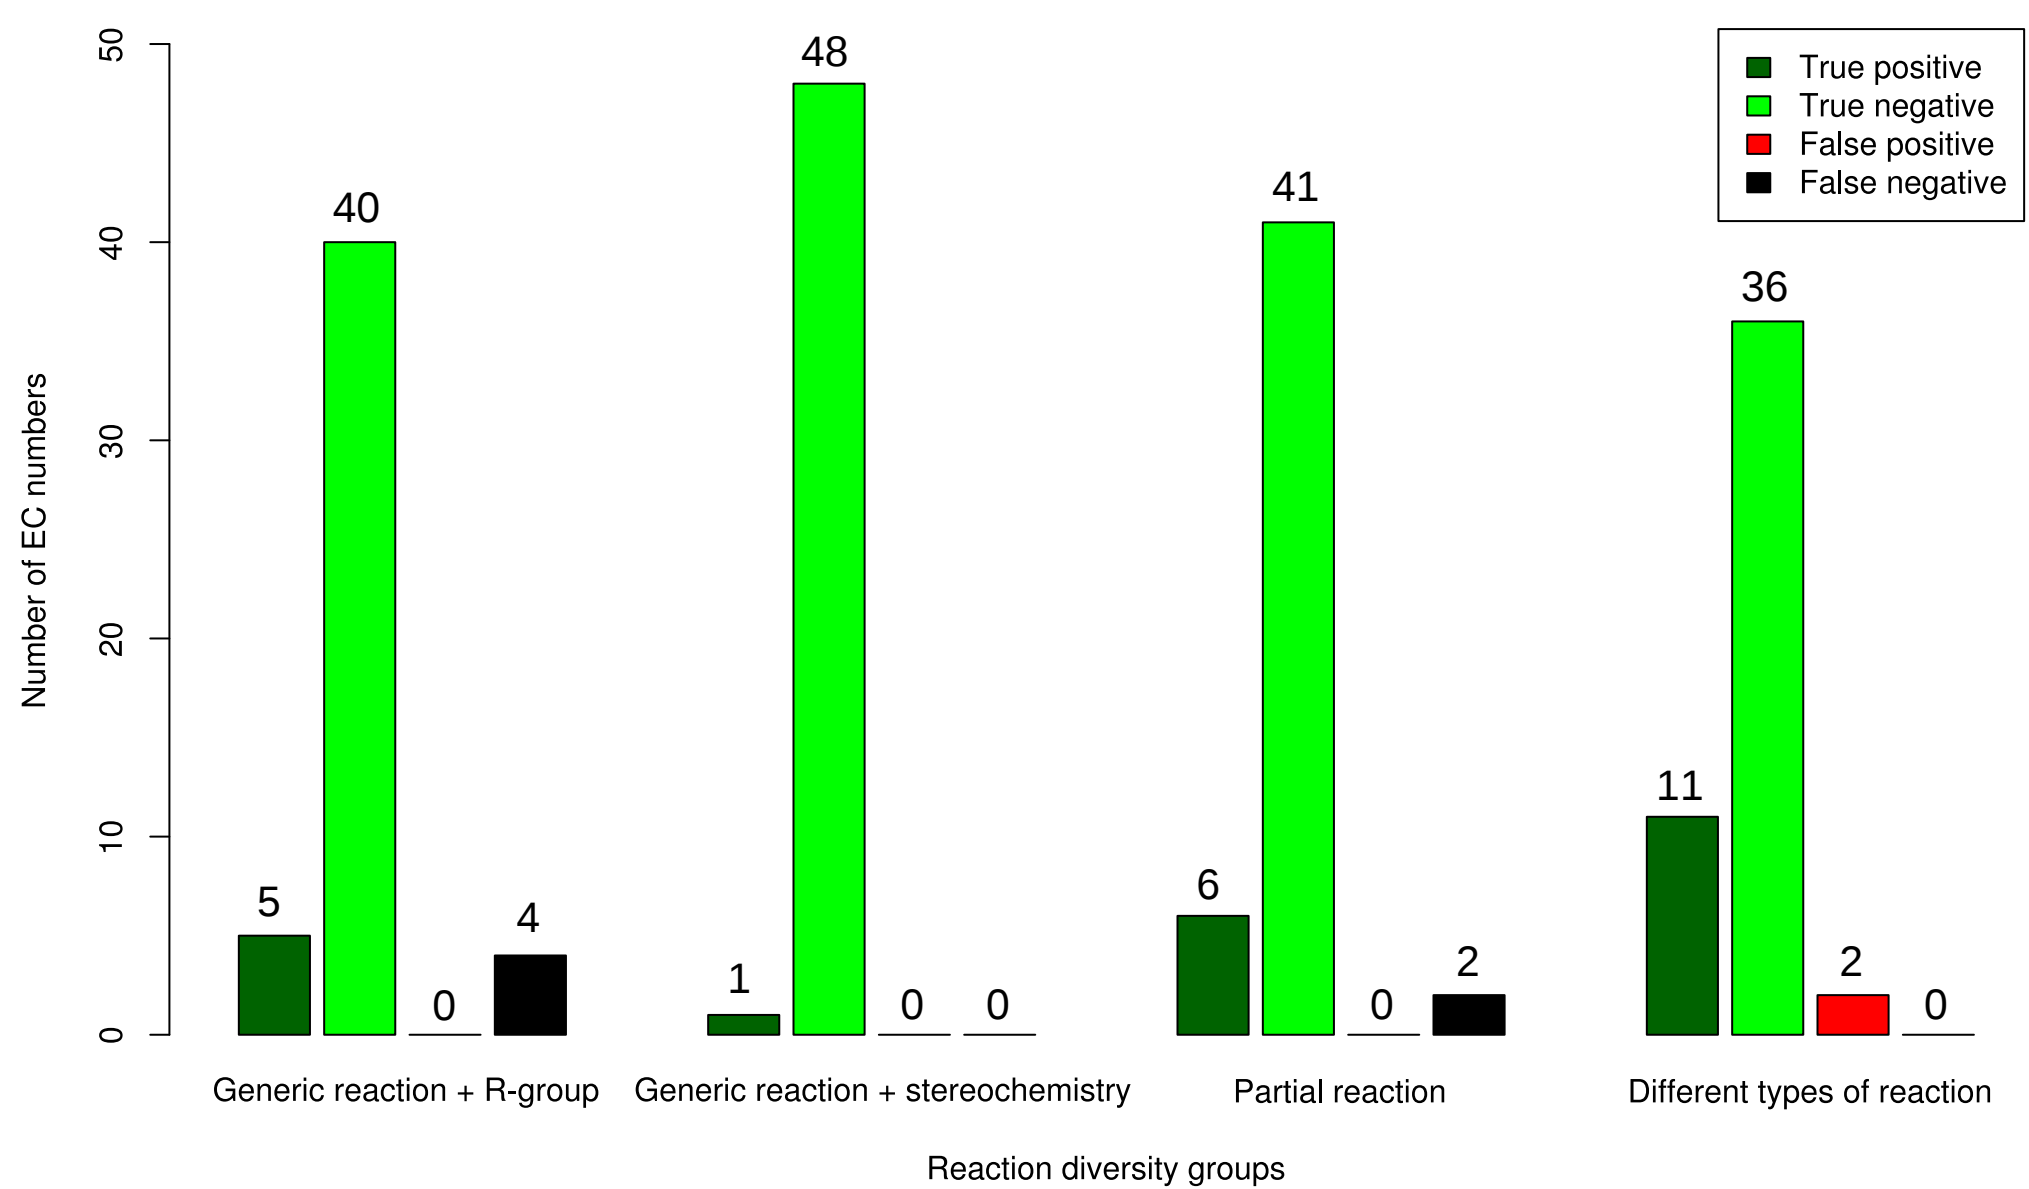

Supplement: pone.0147952.s002.pdf [file pone.0147952.s002.pdf]
