# Supplementary material for: Characterising Complex Enzyme Reaction Data
Source: PubMed Central journal article supplement (PMC4740462; doi:10.1371/journal.pone.0147952), 2016-02-03
Supplement: pone.0147952.s003.pdf [file pone.0147952.s003.pdf]

# 2-Acetolactate mutase (EC 5.4.99.3)

## *Generic reaction - stereochemistry*

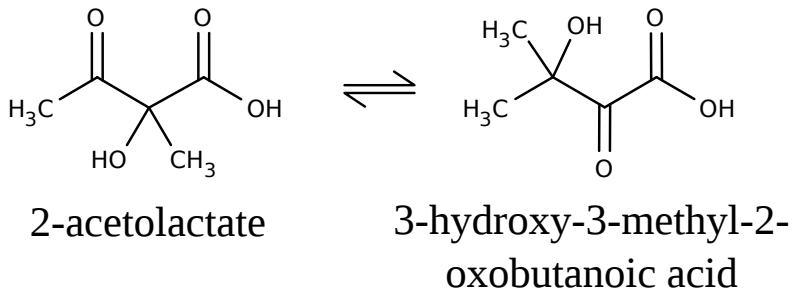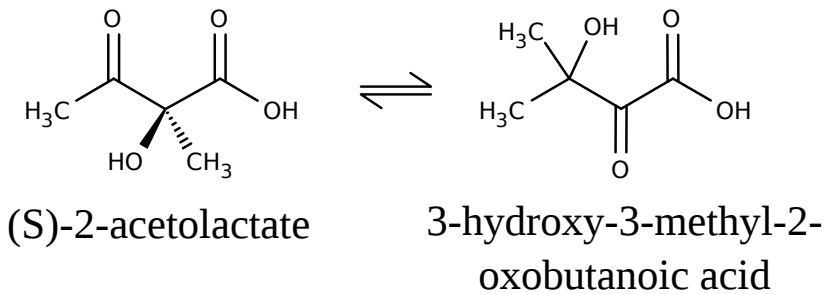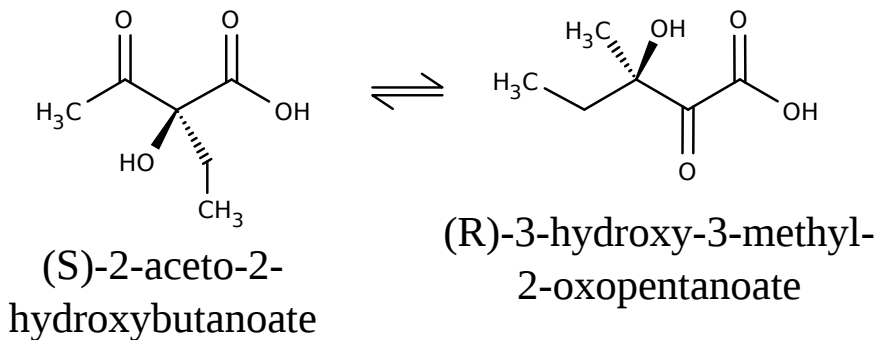

*Different reactants*
