# Supplementary material for: Characterising Complex Enzyme Reaction Data
Source: PubMed Central journal article supplement (PMC4740462; doi:10.1371/journal.pone.0147952), 2016-02-03

## Same chemistry

a

**Different reactants**  
Enoate Reductase (EC 1.3.1.31)

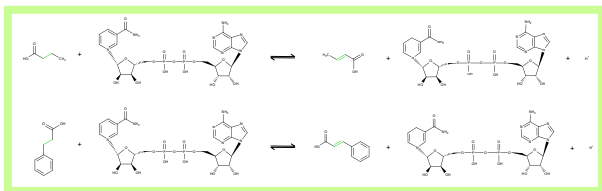

b

**Generic reaction + R-group**  
Phenol Beta-Glucosyltransferase (EC 2.4.1.35)

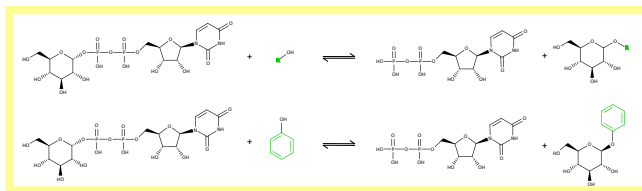

c

**Generic reaction + stereochemistry**  
Glucose-1-Phosphatase (EC 3.1.3.10)

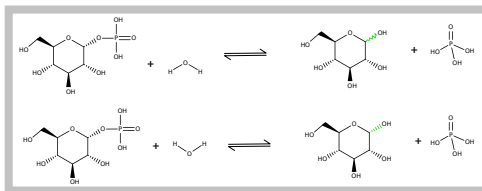

## Partial chemistry

d

**Partial reaction**  
Trypanothione Synthase (EC 6.3.1.9)  
(i) + (ii)

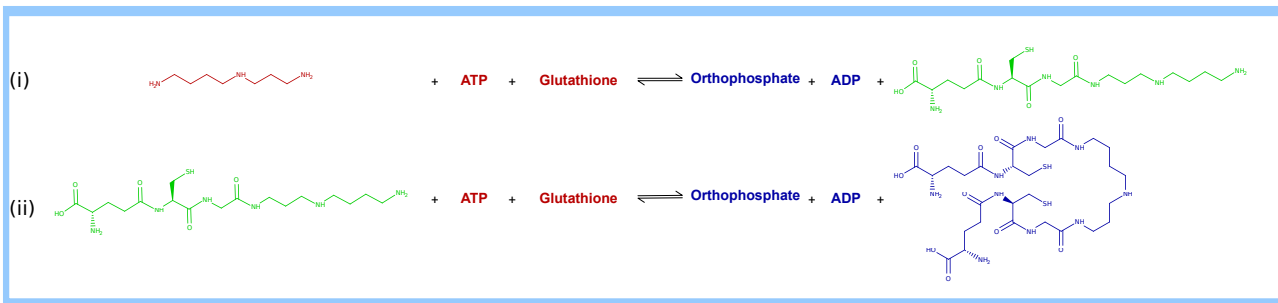

## Different chemistry

e

**Different types of reaction**  
Acetylenedicarboxylate decarboxylase (EC 4.1.1.78)

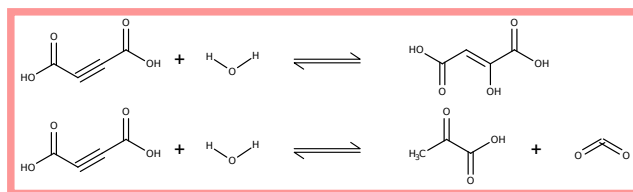

Supplement: pone.0147952.s004.pdf [file pone.0147952.s004.pdf]
